# Supplementary material for: Identification of Genetic Suppressors of the Sin3A Knockdown Wing Phenotype
Source: PLoS One. 2012 Nov 15;7(11):e49563. doi: 10.1371/journal.pone.0049563 (PMC3499482; doi:10.1371/journal.pone.0049563)
Supplement: Table S2 — Deficiencies and alleles that result in suppression of the Sin3A knockdown curved wing phenotype. (XLSX) [file pone.0049563.s002.xlsx]

## Sheet: Table S2
Table S2: Deficiencies and alleles that result in suppression of the Sin3A knockdown curved wing phenotype
Phase Ia	Phase IIa,b	Phase IIIc
		CG Number	Gene Symbol	SIN3 KD I		SIN3 KD II
				RNAi	LOF	RNAi	LOF
control RNAi cross			GFP	10±3d	n.t.	6±4d	n.t.
ED4191 33 ± 11d	BSC178 29 ± 1d	CG1214	ru	n.t.	0	n.t.	0
		CG1004	rho	n.t.	1±2	n.t.	4±4
ED4415 17±5 ED4413 21±7	BSC612 31±5	CG5804	CG5804	20±4	n.t.	15±5	n.t.
		CG32023	CG32023	66±8	n.t.	62±14	n.t.
		CG32024	CG32024	53±5	n.t.	50±5	n.t.
	BSC130 0
ED215 51±2 ED4483 65±8 ED4486 56±1	n.t.	CG10704	toe	n.t.	35±4	n.t.	32±2
		CG10488	eyg	n.t.	76±15	n.t.	70±3
		CG4107	Pcaf	61±4	83±4	54±13	84±6
					72±2		69±1
ED5147 21±4 ED5156 17±8	BSC176 33±6	CG10229	katanin-60	n.t.	0	n.t.	0
		CG12005	Mms19	0	n.t.	0	n.t.
		CG10233	rtp	42±6	n.t.	33±5	n.t.
	BSC177 17±2	CG12000	Prosβ7	0e,f	n.t.	0e,f	n.t.
		CG1163	RpII18	lethal	n.t.	lethal	n.t.
		CG2669	hd	31±5	n.t.	31±5	n.t.
		CG2666	kkv	0	n.t.	0	n.t.
	Exel9029 0
ED10257 27±10	BSC179 16±1	CG10390	Mia	44±4	2±3	44±7	5±4
		CG10018	Snm1	17±4	n.t.	17±3	n.t.
	n.t.	CG1081	Rheb	n.t.	29±1	n.t.	43±8
ED5187 35±2	n.t.	CG1250	sec23	n.t.	58±16	n.t.	37±4
		CG2185	elm	n.t.	2±1	n.t.	1±1
ED7665 16±3	BSC633 14±1 BSC221 31±5 BSC548 22±1 Exel6146 0	CG1101	Ref1	n.t.	0	n.t.	0
		CG1939	Dpck	n.t.	34±4	n.t.	39±1
		CG1070	Alh	n.t.	29±4	n.t.	25±12
		CG33323	Fer1	2±1	n.t.	1±1	n.t.
		CG10061	Sas-4	52±15	2±1	48±0	3±2
		CG2507	sas	100e	49±6	100e	54±4
		CG10055	CG10055	n.t.	3±2	n.t.	5±1
		CG10053	CG10053	48±4	n.t.	48±8	n.t.
		CG1152	Gld	n.t.	44±9	n.t.	24±3
		CG42277/ CG32467	rn	0	n.t.	2±3	n.t.
	BSC465 0 BSC513 0 BSC729 19±2 BSC466 17±3 Exel6263 29±3 BSC196 24±2 BSC222 0	CG2957	mRpS9	n.t.	12±4	n.t.	17±4
		CG14463	CG14463	n.t.	55±13	n.t.	63±4
		CG2702	Pbp95	13±16	n.t.	16±2	n.t.
		CG2723	ImpE3	17±2	n.t.	12±3	n.t.
		CG10903	CG10903	0e	n.t.	0e	n.t.
		CG7910	CG7910	n.t.	43±32	n.t.	36±2
		CG9638	Ada2b	n.t.	0	n.t.	0
		CG9603	CG9603	n.t.	0	n.t.	0
		CG8039	mRpL19	n.t.	2±2	n.t.	6±1
ED5301 24±6	n.t.	CG1988	neur	2±1	2±1	3±4	2±1
		CG11993	Mst85C	37±5	n.t.	40±5	n.t.
		CG11033	Kdm2	22±4	8±2	21±2	7±2
					65±7		63±5
ED5454 29±8 ED5438 23±7	Exel6154 18±3	CG9467	CG9467	0	n.t.	0	n.t.
		CG9461	FBX011	17±2	n.t.	20±2	n.t.
	Exel6155 37±1	CG5358	Art4	51±7	n.t.	60±21	n.t.
		CG33208	Mical	8±4	n.t.	6±4	n.t.
		CG3909	CG3909	28±16	n.t.	20±1	n.t.
		CG3910	mtTFB2	0ef	n.t.	0ef	n.t.
		CG12809	nerfin-2	22±8	n.t.	22±10	n.t.
ED5785 28±2	n.t.	CG7467	osa	n.t.	51±11	n.t.	54±4
		CG7379	CG7379	n.t.	0	n.t.	0
	BSC650 17±4	CG17801	CG17801	9±4	n.t.	10±3	n.t.
		CG7357	CG7357	0	n.t.	0	n.t.
		CG18012	CG18012	0e	n.t.	0e	n.t.
		CG33547	Rim	8±3	n.t.	5±2	n.t.
		CG12347	CG12347	45±8	n.t.	52±10	n.t.
		CG7957	MED17	n.t.	0	n.t.	0
		CG7998	Mdh2	n.t.	0	n.t.	0
	n.t.	CG43662	Rpb4	n.t.	16±3	n.t.	17±3
ED6220 22±6	BSC397 33±5 Exel6200 49±2	CG6677	ash2	0e	21±16	0e	38±3
				0e	27±1	0e	25±7
		CG13628	Rpb10	0e,f	n.t.	0e,f	n.t.
		CG6875	asp	40±11	23±14	51±3	46±6
		CG13633	Ast	9±2	n.t.	10±3	n.t.
		CG6892	Ets96B	n.t.	0	n.t.	0
		CG11375	polybromo	0	n.t.	0	n.t.
		CG5814	CycB3	11±4	2±2	13±2	8±3
	n.t.	CG31110	5PtaseI	60±5	n.t.	70±9	n.t.
	Exel6201 29±6	CG13651	Danr	0±1	n.t.	1±1	n.t.
	BSC493 0	CG11848	Bili	55±6	28±11	55±10	35±5
					24±9		18±3
ED6255 24±7 ED6265 17±8	Exel6205 20±6	CG6134	spz	n.t.	0	n.t.	0
	Exel6206 0
	Exel6208 13±1	CG6127	Ser	n.t.	4±3	n.t.	2±1
		CG5923	DNApol-α73	0e,f	n.t.	0e,f	n.t.
		CG5930	TfIIA-L	0e	69±1	0e	73±4
		CG5974	pII	n.t.	26±6	n.t.	33±6
	n.t.	CG5965	woc	0	n.t.	0	n.t.
	BSC686 14±0	CG12876	ALiX	n.t.	24±18	n.t.	30±2
		CG5583	Ets98B	n.t.	4±5	n.t.	2±2
ED6310 33±1 ED6316 38±6	Exel6212 20±6	CG14514	Brd8	100e	15±4	100e	18±2
		CG11951	CG11951	n.t.	54±2	n.t.	46±6
ED6332 21±5	n.t.	CG15532	hdc	0e	n.t.	0e	n.t.
		CG2216	Fer1HCH	0e	n.t.	0e	n.t.
a In phase I and II, SIN3 KD I/CyO-Ras flies were crossed to indicated flies in which the deletion was balanced over TM2-Ubx, TM3-Sb, TM3-Ser or TM6-Tb.
b In phase II, SIN3 KD I/CyO-Ras flies were crossed to indicated flies that contained smaller deletions located within the phase I positive deletion.
c In phase III, an RNAi or loss of function (LOF) allele of a gene located within the phase II deletion as indicated was crossed to SIN3 KD I and SIN3 KD II/CyO-Ras flies. In some cases the phase I deletion was small and the individual gene listed is located within the phase I and not an additional phase II deletion.
d The percentage of straight winged flies in the population is given. The curved wing phenotype was scored in progeny of the cross that carried the Sin3A knockdown chromosome (SIN3 KD) and the third chromosome balancer and compared to siblings carrying the Sin3A knockdown and deletion chromosomes. The results are the average of three independent experiments. Standard deviation is indicated. n>100.
e Flies had a wing phenotype that was neither straight nor curved.
f The dual knockdown of Sin3A and the indicated gene resulted in partial lethality.
Diagonal line, no individual genes from the genomic region were tested as the phase II deletion did not suppress the curved wing phenotype.
n.t., not tested.
